# Supplementary material
Source: PubMed Central journal article supplement (PMC4614754)
Supplement: rspb20151513supp1.pdf [file rspb20151513supp1.pdf]

Table S1. Inorganic nutrient concentrations during the long-term acclimation of *N. lecointei* to three  $p\text{CO}_2$  treatments. Values represent average  $\pm$ standard deviation (n=2). One sample was lost due to technical error.

| Day | $p\text{CO}_2$      | $\text{NO}_2^- + \text{NO}_3^-$ | $\text{PO}_4^{3-}$ | $\text{Si(OH)}_4$ |
|-----|---------------------|---------------------------------|--------------------|-------------------|
| 97  | 280 $\mu\text{atm}$ | 831 ( $\pm 27$ )                | 28 ( $\pm 0.4$ )   | 146 ( $\pm 25$ )  |
|     | 390 $\mu\text{atm}$ | 878 ( $\pm 6$ )                 | 28 ( $\pm 0.04$ )  | 150 ( $\pm 10$ )  |
|     | 960 $\mu\text{atm}$ | 858 ( $\pm 44$ )                | 28 ( $\pm 1$ )     | 149 ( $\pm 11$ )  |
| 147 | 280 $\mu\text{atm}$ | 905 ( $\pm 23$ )                | 30 ( $\pm 0.3$ )   | 190 ( $\pm 4$ )   |
|     | 390 $\mu\text{atm}$ | 857 ( $\pm 3$ )                 | 30 ( $\pm 0.4$ )   | 179 ( $\pm 0$ )   |
|     | 960 $\mu\text{atm}$ | 994 ( $\pm 192$ )               | 26 ( $\pm 6$ )     | 204 ( $\pm 37$ )  |
| 187 | 280 $\mu\text{atm}$ | 858 ( $\pm 11$ )                | 32 ( $\pm 1$ )     | 183 ( $\pm 17$ )  |
|     | 390 $\mu\text{atm}$ | 913                             | 32                 | 191               |
|     | 960 $\mu\text{atm}$ | 874 ( $\pm 33$ )                | 32 ( $\pm 0.3$ )   | 191 ( $\pm 14$ )  |

Table S2. Inorganic nutrient concentrations during the switched treatment assay of *N. lecointei*. Cultures have been acclimated to 390 and 960  $\mu\text{atm}$   $p\text{CO}_2$  for 194 days, and subsequently short-term assayed for 13 days with the opposite treatment to study sustained effects of  $p\text{CO}_2$  acclimation. Values represent average  $\pm$ standard deviation (n=2). One sample was lost due to technical error.

| $p\text{CO}_2$ acclimation | $p\text{CO}_2$ assay | $\text{NO}_2^- + \text{NO}_3^-$ | $\text{PO}_4^{3-}$ | $\text{Si(OH)}_4$ |
|----------------------------|----------------------|---------------------------------|--------------------|-------------------|
| 390 $\mu\text{atm}$        | 390 $\mu\text{atm}$  | 944                             | 32                 | 186               |
| 390 $\mu\text{atm}$        | 960 $\mu\text{atm}$  | 1002 ( $\pm 6$ )                | 31 ( $\pm 1$ )     | 194 ( $\pm 4$ )   |
| 960 $\mu\text{atm}$        | 390 $\mu\text{atm}$  | 1048 ( $\pm 93$ )               | 29 ( $\pm 6$ )     | 202 ( $\pm 25$ )  |
| 960 $\mu\text{atm}$        | 960 $\mu\text{atm}$  | 1010 ( $\pm 6$ )                | 32 ( $\pm 0.1$ )   | 193 ( $\pm 20$ )  |

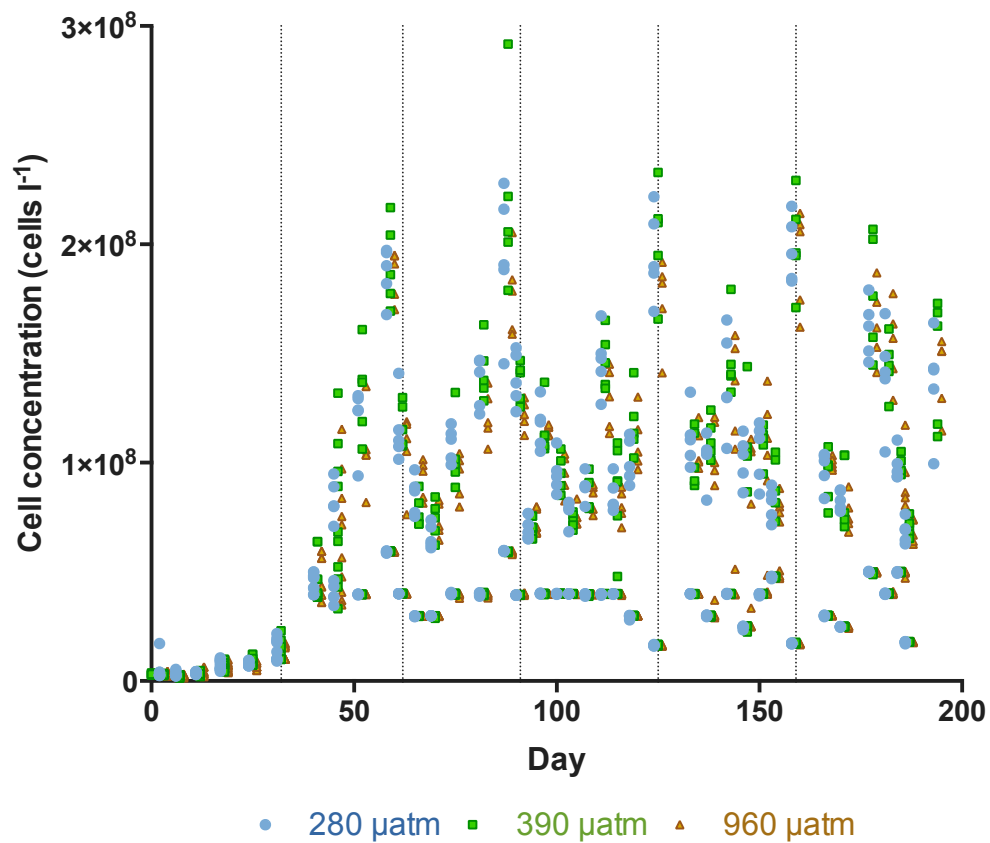

Figure S1. Cell densities in each flask before and after dilutions. Note that points in the respective treatment are slightly nudged ( $\pm 1$  day) across the x-axis for better visualization. Dashed vertical lines show the days where the culture flasks were acid-washed.

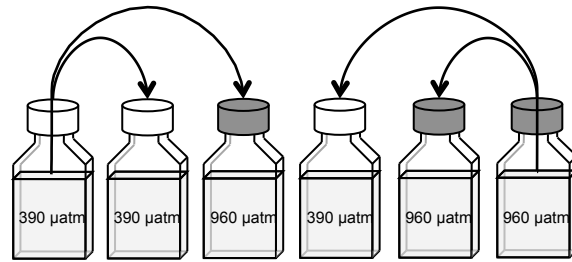

Figure S2. Schematic view of the switched treatment assay. At the end of the long-term acclimation, each sample from the 390 and 960  $\mu\text{atm}$  treatments was transferred into two new experimental flasks. One of the flasks was switched to the opposite  $p\text{CO}_2$ , and the other one maintained at the same treatment to act as a control. The switched treatment assay lasted for 13 days to study sustained effects of increased  $p\text{CO}_2$  after long-term acclimation.

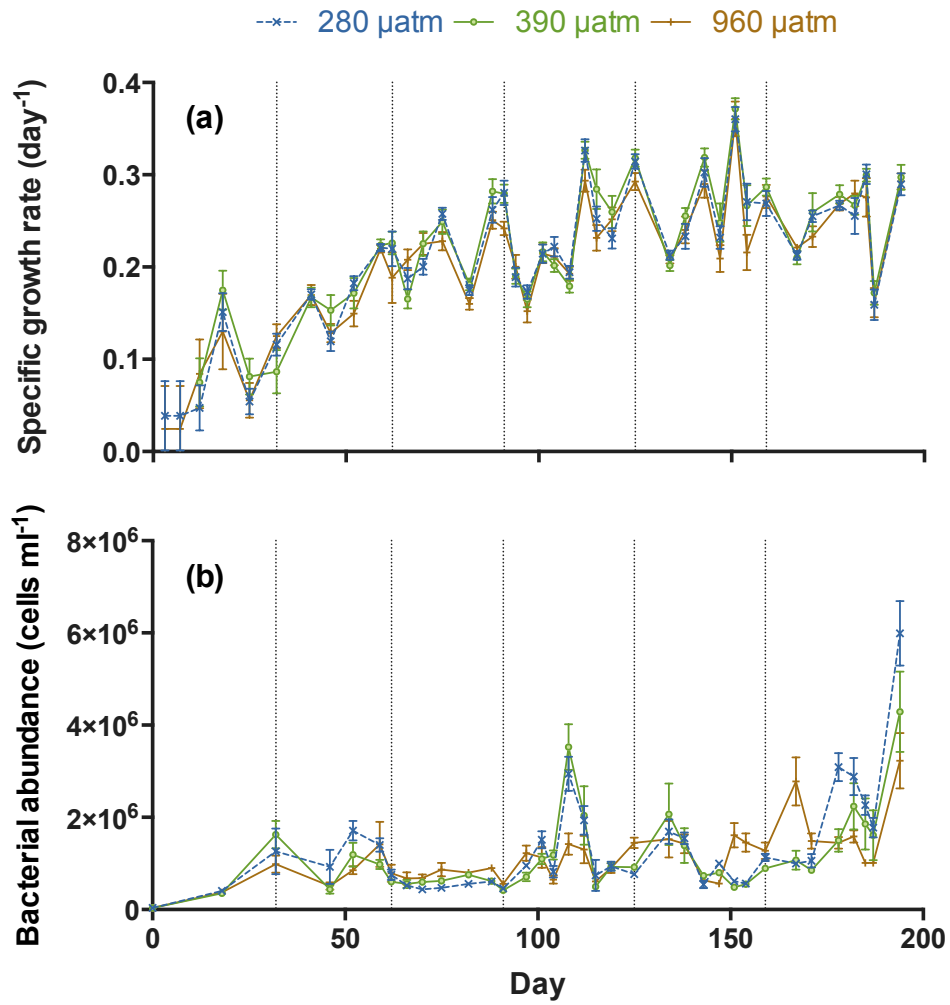

Figure S3. Specific growth rate of *Nitzschia lecontei* (a) and bacterial abundance (b) under the experiment. Specific growth rate is calculated between every sampling day. Dashed vertical lines show the days where the culture flasks were acid-washed. Error bars represent standard errors (n=5).

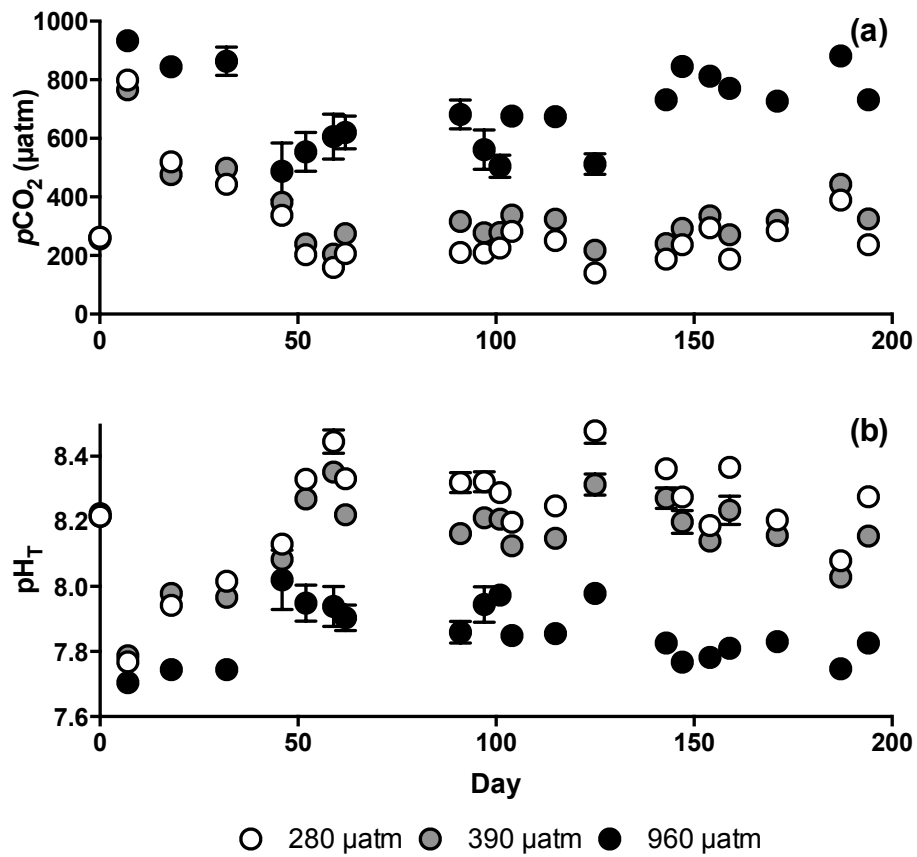

Figure S5. Carbonate system parameters during the long-term  $p\text{CO}_2$  perturbation experiment (at  $-1.8^\circ\text{C}$ , salinity 33). (a) Calculated  $p\text{CO}_2$  in the different treatments, derived from  $\text{pH}_T$  and total alkalinity with the software CO2SYS. (b) Measured  $\text{pH}_T$  in the different treatments. Error bars represent standard error ( $n=5$ ).
